# Supplementary material for: Temporal patterns of greenhouse gas emissions from two small thermokarst lakes in Nunavik, Canada
Source: Copernicus journal article supplement (doi:10.5194/egusphere-2025-1497), 2025-04-14
Supplement: Supplementary file 1 [file egusphere-2025-1497-supplement.pdf]

# Supplementary Informations

Pouliot, Amélie<sup>1,3</sup>; Laurion, Isabelle<sup>2,3</sup>; Thiboult, Antoine<sup>1</sup>; Nadeau, Daniel F.<sup>1</sup>

<sup>1</sup>Department of Civil and Water Engineering, Université Laval, Québec, Qc

<sup>2</sup>Centre Eau Terre Environnement, Institut national de la recherche scientifique, Québec, Qc

<sup>3</sup>Centre d'études nordiques, Université Laval, Québec, Qc

*Correspondence to:* Amélie Pouliot (amelie.pouliot.1@ulaval.ca)

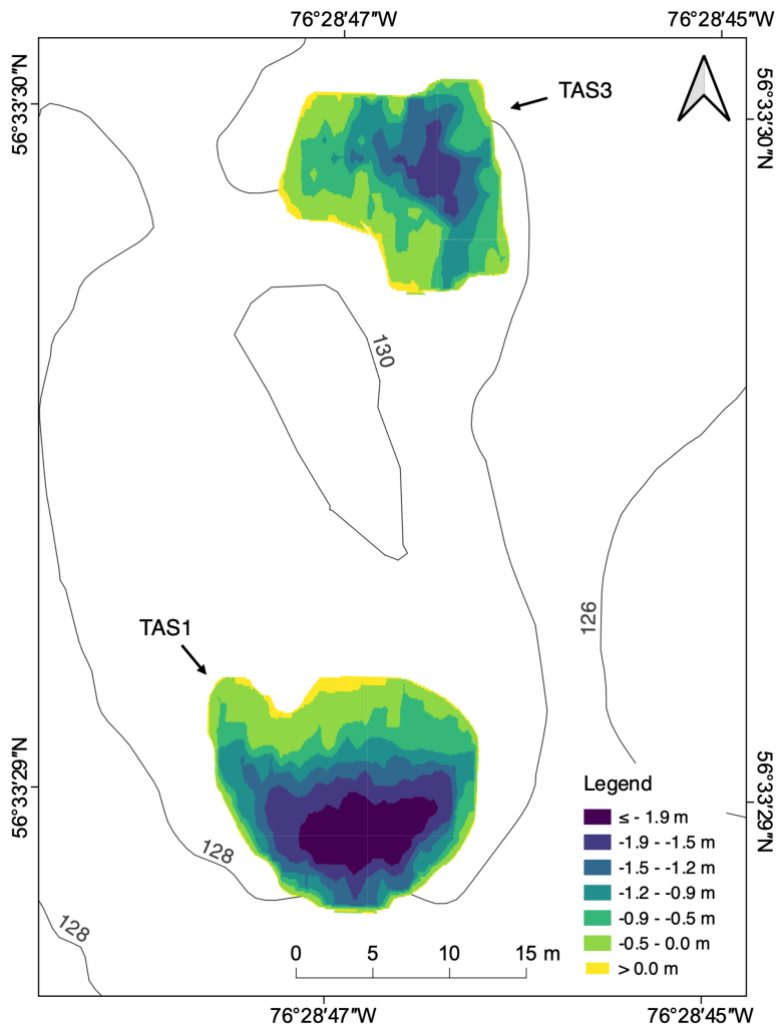

**Figure S1.** Bathymetric maps of lakes TAS1 and TAS3 obtained on 07 July 2022.

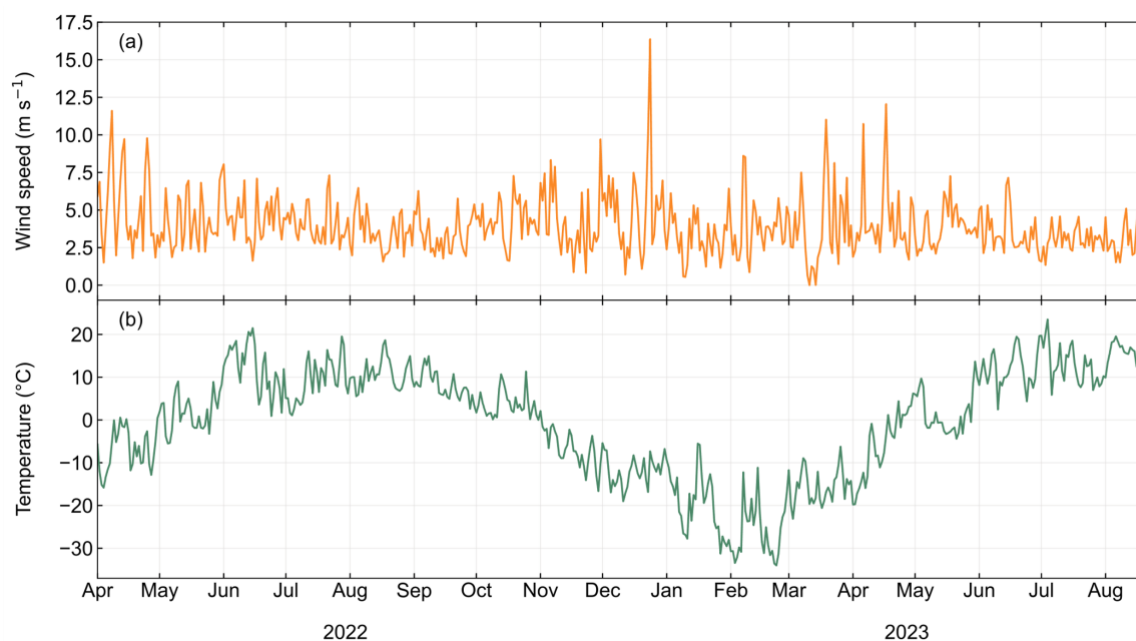

**Figure S2.** Weather conditions in the Tasiapik Valley from summer 2022 to summer 2023, showing (a) wind speed at 10 m and (b) air temperature. The brackets on top indicate the measurement campaign periods.

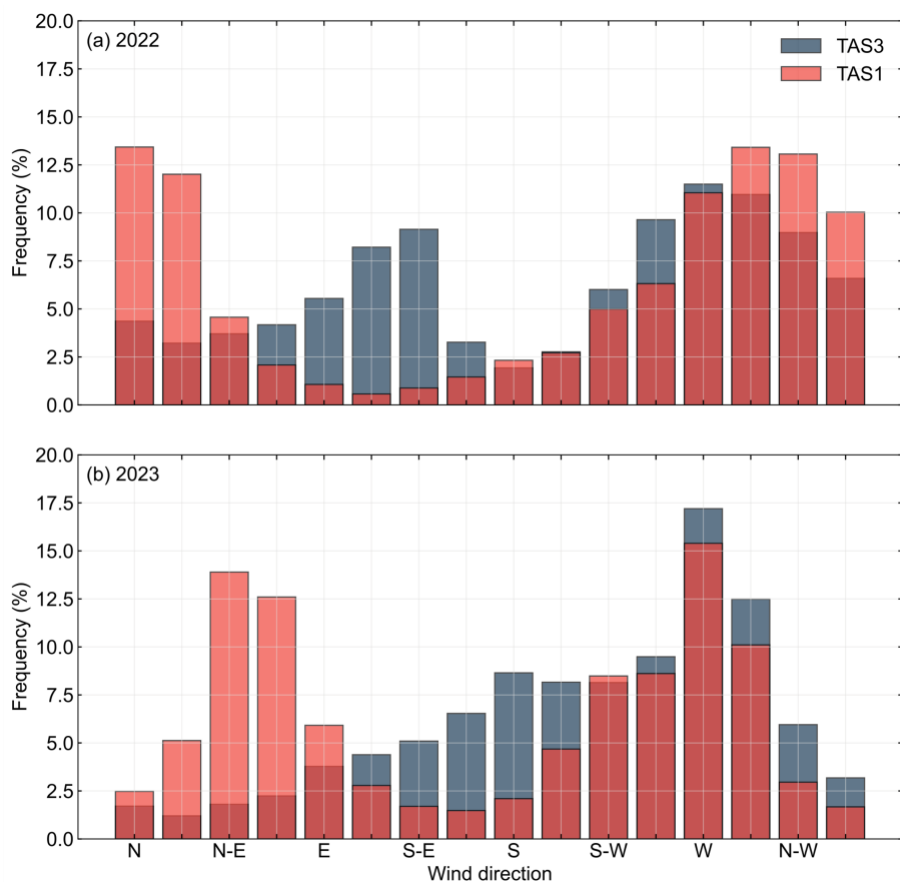

**Figure S3.** Wind direction frequency at lakes TAS1 and TAS3 for (a) July 2022 and (b) August 2023.

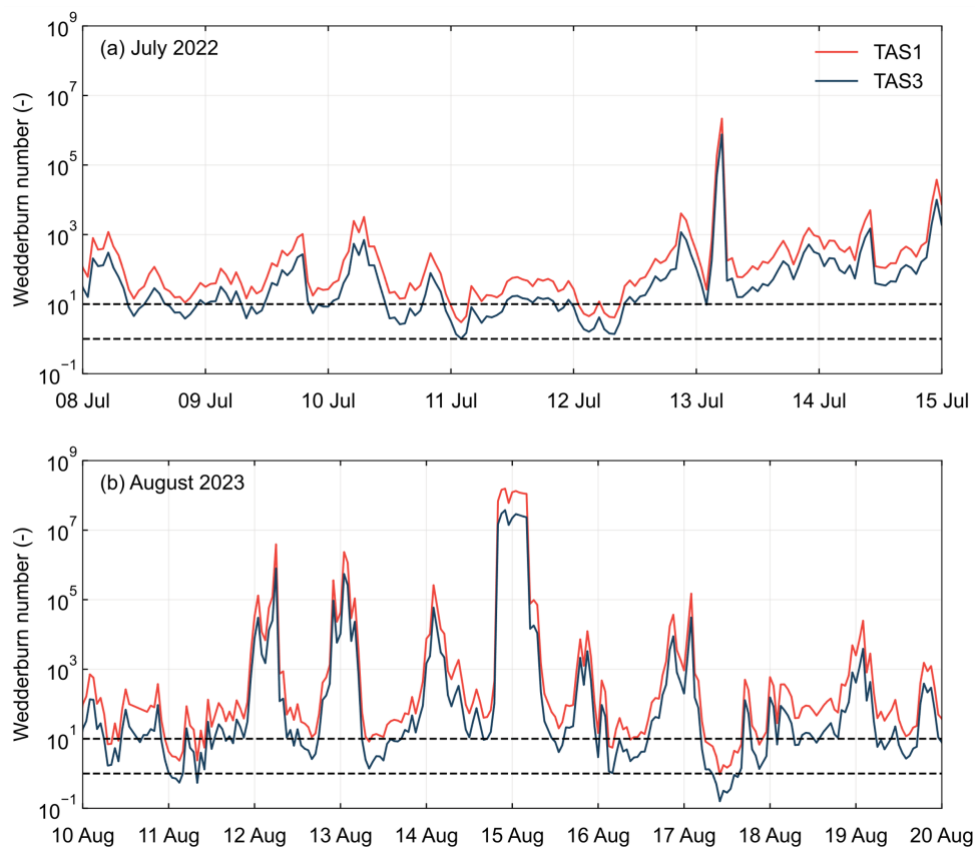

**Figure S4. Wedderburn number (dimensionless) at lakes TAS1 and TAS3 during the measurement campaigns of (a) July 2022 and (b) August 2023.**

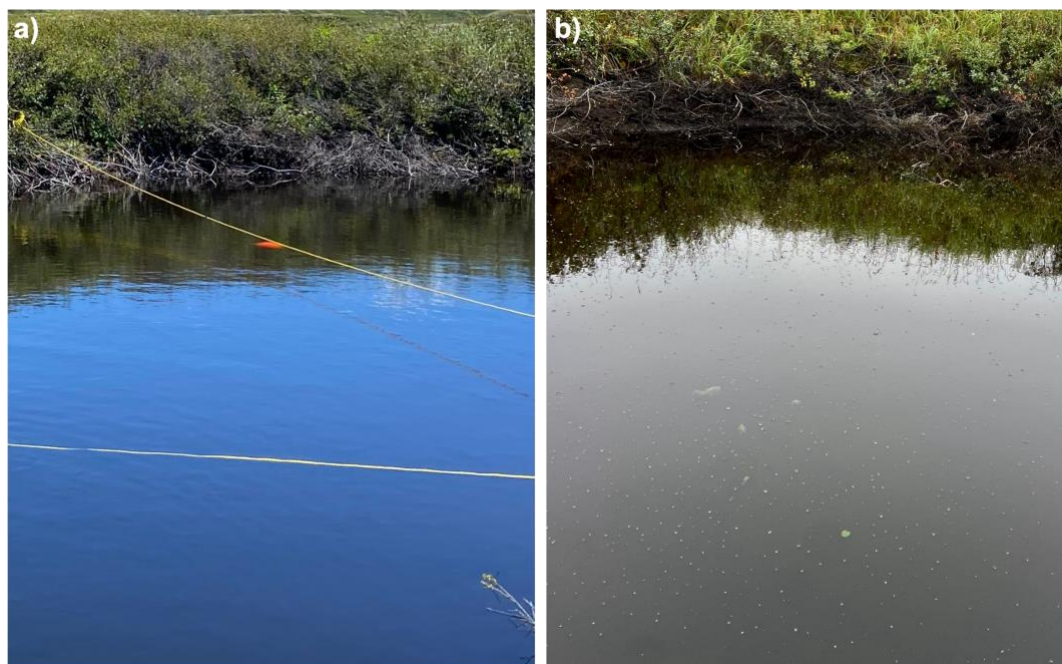

**Figure S5. Photographs of the water surface of lake TAS3 taken on calm days in (a) July 2022, showing no visible bubbles, and (b) August 2023, highlighting the marked presence of escaping bubbles.**

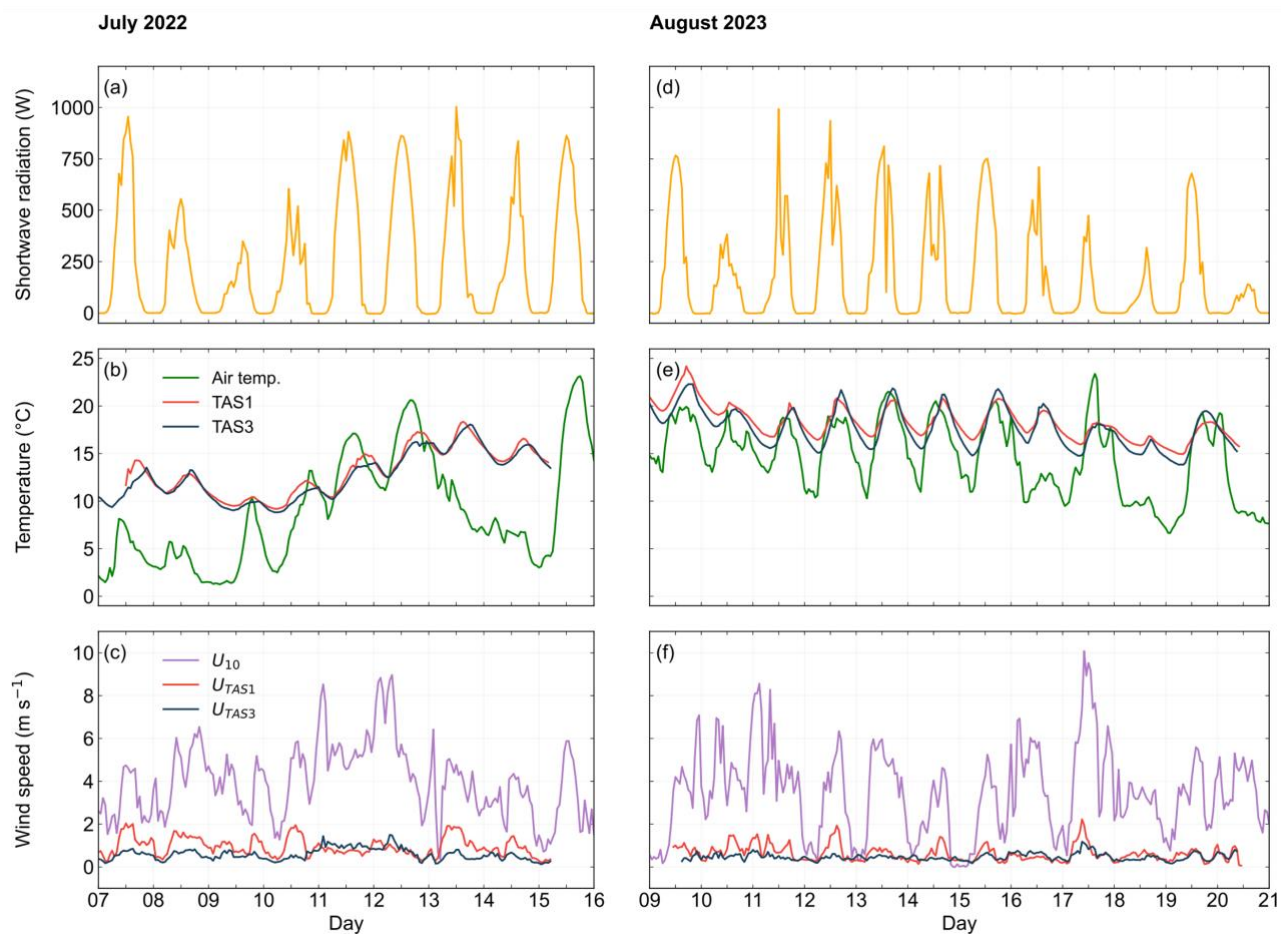

**Figure S6. Shortwave radiation, air temperature, surface temperature in lakes TAS 1 and TAS3, and wind speed at 10 m in July 2022 (a, b, c) and August 2023 (d, e, f).**

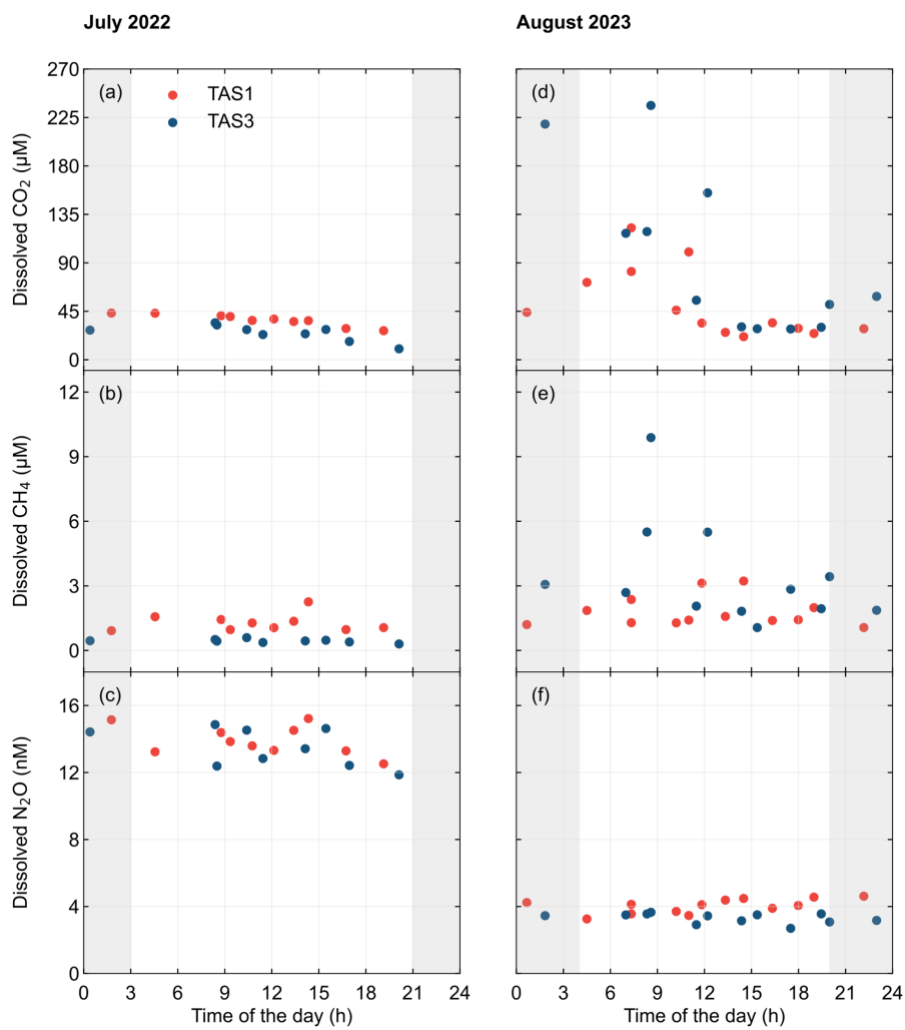

**Figure S7.** Near-surface concentrations of CO<sub>2</sub>, CH<sub>4</sub> and N<sub>2</sub>O in July 2022 (a, b, c) and August 2023 (d, e, f) for TAS1 and TAS3.

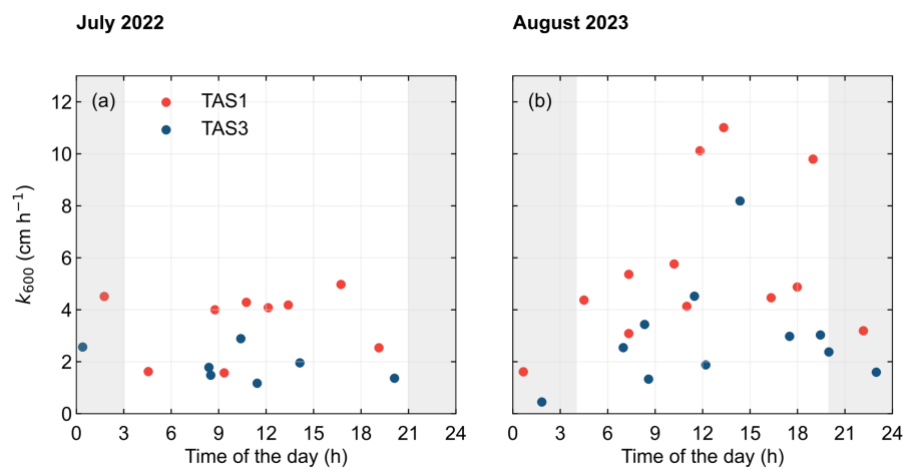

**Figure S8.** Gas transfer coefficient estimated from the gas chamber method in (a) July 2022 and (b) August 2023 for lakes TAS1 and TAS3.

**Table S1. Depth from lake bottom of the submersible automated data loggers of Temperature (HOBO U22-001), conductivity (HOBO U24-001, also measures temperature), pressure (HOBO U20L-01, also measures temperature), and dissolved oxygen (PME miniDOT, also measures temperature). Maximum depth varied between 248 and 290 cm in TAS1, and between 149 and 232 cm in TAS3.**

| Automated loggers                    | TAS1                   | TAS3 |
|--------------------------------------|------------------------|------|
|                                      | Depth from bottom (cm) |      |
| Pressure and temperature             | 18                     | 22   |
| Conductivity, oxygen and temperature | 58                     | 44   |
| Temperature                          | 97                     | 66   |
| Temperature                          | 136                    | 99   |
| Temperature                          | 176                    | 121  |
| Oxygen                               | 193                    | 144  |
| Conductivity and temperature         | 210                    | 144  |

**Table S2. Date and time (EST) of the chamber flux measurements at lakes TAS1 and TAS3 in July 2022 and August 2023.**

| Lake | July 2022        | August 2023      |
|------|------------------|------------------|
| TAS1 | 2022-07-07 9:14  | 2023-08-10 11:50 |
|      | 2022-07-07 13:36 | 2023-08-11 19:10 |
|      | 2022-07-11 1:59  | 2023-08-12 22:41 |
|      | 2022-07-11 16:09 | 2023-08-13 18:18 |
|      | 2022-07-12 11:53 | 2023-08-14 10:28 |
|      | 2022-07-12 19:03 | 2023-08-14 13:48 |
|      | 2022-07-13 8:37  | 2023-08-15 1:23  |
|      | 2022-07-13 10:51 | 2023-08-15 16:55 |
|      | 2022-07-15 4:19  | 2023-08-16 5:09  |
|      |                  | 2023-08-18 11:41 |
| TAS3 |                  | 2023-08-19 8:00  |
|      |                  | 2023-08-20 8:00  |
|      | 2022-07-07 10:41 | 2023-08-10 13:44 |
|      | 2022-07-07 14:22 | 2023-08-11 20:19 |
|      | 2022-07-08 8:42  | 2023-08-12 23:36 |
|      | 2022-07-11 0:59  | 2023-08-13 19:42 |
|      | 2022-07-11 17:15 | 2023-08-14 11:45 |
|      | 2022-07-12 11:11 | 2023-08-14 14:42 |
|      | 2022-07-12 19:47 | 2023-08-15 2:15  |
|      | 2022-07-13 9:50  | 2023-08-15 17:53 |
|      | 2022-07-15 4:57  | 2023-08-16 7:18  |
|      |                  | 2023-08-18 12:46 |
|      |                  | 2023-08-19 8:54  |
|      |                  | 2023-08-20 9:03  |

**Table S3. Bottom concentrations of CO<sub>2</sub>, CH<sub>4</sub> and N<sub>2</sub>O measured in lakes TAS1 and TAS3 with the headspace method. Values are expressed as mean  $\pm$  standard deviation (min - max). N = 4 in 2022 and N = 2 in 2023. Water was sampled about 15 cm above sediments.**

| Bottom concentration       | July 2022                           |                                      | August 2023                         |                                      |
|----------------------------|-------------------------------------|--------------------------------------|-------------------------------------|--------------------------------------|
|                            | TAS1                                | TAS3                                 | TAS1                                | TAS3                                 |
| CO <sub>2</sub> ( $\mu$ M) | 315.6 $\pm$ 225.6<br>(89.8 - 510.5) | 333.4 $\pm$ 239.0<br>(135.1 - 646.8) | 813.5 $\pm$ 3.4<br>(811.1 - 815.9)  | 770.4 $\pm$ 63.2<br>(725.7 - 815.1)  |
| CH <sub>4</sub> ( $\mu$ M) | 103.1 $\pm$ 81.1<br>(26.2 - 174.5)  | 92.3 $\pm$ 98.1<br>(16.3 - 222.7)    | 591.6 $\pm$ 97.9<br>(522.4 - 660.9) | 400.1 $\pm$ 147.0<br>(296.2 - 504.0) |
| N <sub>2</sub> O (nM)      | 11.3 $\pm$ 2.9<br>(7.3 - 14.0)      | 10.7 $\pm$ 3.3<br>(7.6 - 14.2)       | -                                   | -                                    |

**Table S4. Gas transfer velocities ( $k_{600}$ ) measured with the floating chamber in lakes TAS1 and TAS3 using surface GHG concentrations obtained by the headspace method. Values are expressed as mean  $\pm$  standard deviation (min-max).**

| Period      | $k_{600}$ (cm h <sup>-1</sup> ) |                              |
|-------------|---------------------------------|------------------------------|
|             | TAS1                            | TAS3                         |
| July 2022   | 3.5 $\pm$ 1.4<br>(1.6 - 5.0)    | 1.9 $\pm$ 0.6<br>(1.2 - 2.9) |
| August 2023 | 5.7 $\pm$ 3.0<br>(1.6 - 11.0)   | 2.9 $\pm$ 2.1<br>(0.5 - 8.2) |

**Table S5. Gas transfer velocities ( $k_{600}$ ) estimated with the surfacer renewal model in lakes TAS1 and TAS3. Values are expressed as mean (min-max).**

| Lake        | $k_{600}$ (cm h <sup>-1</sup> ) |
|-------------|---------------------------------|
| Summer 2022 |                                 |
| TAS1        | 3.0 (0.8 - 6.4)                 |
| TAS3        | 3.6 (0.9 - 7.9)                 |
| Fall 2022   |                                 |
| TAS1        | 3.0 (0.3 - 7.2)                 |
| TAS3        | 3.4 (0.3 - 8.1)                 |
| Spring 2023 |                                 |
| TAS1        | 3.3 (0.7 - 6.2)                 |
| TAS3        | 3.7 (0.8 - 6.9)                 |
| Summer 2023 |                                 |
| TAS1        | 3.0 (0.4 - 7.0)                 |
| TAS3        | 3.7 (0.4 - 8.8)                 |

**Table S6. Average bottom concentrations of CO<sub>2</sub>, CH<sub>4</sub>, and N<sub>2</sub>O in lakes TAS1 and TAS3 estimated across limnological seasons. These estimates were derived from summer average surface concentrations measured during the campaigns (for summer estimates), total gas concentrations in the water column during summer (for fall estimates), and the summer-to-winter gas concentration ratio reported by Matveev et al. (2019) (for spring estimates).**

| Lake        | CO <sub>2</sub> (μM) | CH <sub>4</sub> (μM) | N <sub>2</sub> O (nM) |
|-------------|----------------------|----------------------|-----------------------|
| Summer 2022 |                      |                      |                       |
| TAS1        | 37.9                 | 1.3                  | 13.9                  |
| TAS3        | 25.0                 | 0.4                  | 13.5                  |
| Fall 2022   |                      |                      |                       |
| TAS1        | 52.1                 | 7.7                  | 14.0                  |
| TAS3        | 70.0                 | 13.3                 | 13.5                  |
| Spring 2023 |                      |                      |                       |
| TAS1        | 34.9                 | 8.2                  | -                     |
| TAS3        | 46.9                 | 14.1                 | -                     |
| Summer 2023 |                      |                      |                       |
| TAS1        | 51.1                 | 1.8                  | 4.0                   |
| TAS3        | 94.2                 | 3.5                  | 3.3                   |
| Fall 2023   |                      |                      |                       |
| TAS1        | 186.2                | 62.8                 | -                     |
| TAS3        | 275.9                | 99.8                 | -                     |
| Spring 2024 |                      |                      |                       |
| TAS1        | 124.7                | 66.7                 | -                     |
| TAS3        | 184.8                | 106.0                | -                     |



## References

Matveev, A., Laurion, I., & Vincent, W. F. (2019). Winter Accumulation of Methane and its Variable Timing of Release from Thermokarst Lakes in Subarctic Peatlands. *Journal of Geophysical Research: Biogeosciences*, 124(11), 3521-3535.  
<https://doi.org/10.1029/2019JG005078>
